# Supplementary material for: Cost-Effectiveness of Pneumococcal Vaccines for Adults in the United States
Source: PubMed Central journal article supplement — Adv Ther. 2014 Apr 10;31(4):392–409. doi: 10.1007/s12325-014-0115-y (PMC4003344; doi:10.1007/s12325-014-0115-y), 2014-04-10
Supplement: 12325_2014_115_MOESM3_ESM.pdf [file 12325_2014_115_MOESM3_ESM.pdf]

- An economic model was developed to evaluate cost-effectiveness of pneumococcal vaccination for adults in the United States.
- The 2012 Advisory Committee on Immunization Practices (ACIP) recommendation was found to be more economically efficient than 1997 recommendation.
- For potential future pneumococcal vaccination policies, the most economically efficient vaccination policy would be to maintain the 2012 ACIP recommendation for 23-valent pneumococcal polysaccharide vaccine (PPSV23) for healthy and immunocompetent adults with comorbidities, and to modify the recommendation for adults with immunocompromising conditions by replacing PPSV23 with a sequential regimen of 13-valent pneumococcal conjugate vaccine and PPSV23 at age 65 years.
- Results were sensitive to vaccine effectiveness and herd impact assumptions.

This summary slide represents the opinions of the authors. Funding was provided from Merck for publication of this article. For a full list of acknowledgments and conflicts of interest for all authors of this article, please see the full text online. Copyright © The Author(s) 2014. Creative Commons Attribution Noncommercial License (CC BY-NC).
